# Supplementary material for: Evolution of Diagnoses, Survival, and Costs of Oncological Medical Treatment for Non-Small-Cell Lung Cancer over 20 Years in Osona, Catalonia
Source: MDPI journal article supplement (doi:10.3390/curroncol31040159), 2024-04-09
Supplement: s1 [file s1]

## SUPPLEMENTARY MATERIALS:

**Supplementary Table S1.** Factors associated with mortality at 18 months and their Hazard Ratios.

| Variable           | Categories     | Hazard Ratio (CI 95%)  |
|--------------------|----------------|------------------------|
| Diagnosis year     | 2002-2006      | 1                      |
|                    | 2007-2011      | 0,952 (0,761 – 1,191)  |
|                    | 2012-2016      | 1,032 (0,827 – 1,287)  |
|                    | 2017-2021      | 0,590 (0,463 – 0,752)  |
| Age at diagnosis   | < 65 years     | 1                      |
|                    | 65 – 74 years  | 1,239 (1,021 – 1,504)  |
|                    | 75 – 79 years  | 1,367 (1,080 – 1,731)  |
|                    | >80 years      | 2,068 (1,625 – 2,632)  |
| Smoking habit      | Current smoker | 1                      |
|                    | Former smoker  | 0,918 (0,765 – 1,1052) |
|                    | Non-smoker     | 0,571 (0,430 – 0,757)  |
|                    | Unknown        | 1,143 (0,829 – 1,576)  |
| Stage at diagnosis | I              | 1                      |
|                    | II             | 1,620 (0,945 – 2,777)  |
|                    | III            | 3,333 (2,095 – 5,302)  |
|                    | IV             | 7,841 (4,985 – 12,332) |

**Supplementary Table S2.** Total, mean, and median costs per year of diagnosis.

| Diagnosis year | Medically treated patients | Total Cost per year | Mean cost (SD)             | Median cost (p25-p75)       |
|----------------|----------------------------|---------------------|----------------------------|-----------------------------|
| 2002           | 22                         | 31.089,50 €         | 1.413,16 €<br>(3.106,7)    | 651,0€<br>(393-1.182)       |
| 2003           | 32                         | 90.273,40 €         | 2.821,04 €<br>(4.263,9)    | 1.222,0€<br>(438-1.945)     |
| 2004           | 17                         | 59.746,33 €         | 3.514,49 €<br>(5.361,9)    | 868,0€<br>(434-4.311)       |
| 2005           | 21                         | 30.478,07 €         | 1.451,34 €<br>(1.814,2)    | 1142,0€<br>(420-1.577)      |
| 2006           | 23                         | 79.141,23 €         | 3.440,92 €<br>(8.888,6)    | 868,0€<br>(230-1.406)       |
| 2007           | 29                         | 104.414,10 €        | 3.600,49 €<br>(5.961,2)    | 920,0€<br>(434-4.926)       |
| 2008           | 25                         | 125.918,20 €        | 5.036,73 €<br>(10.879,1)   | 1.071,0€<br>(434-4.110)     |
| 2009           | 38                         | 448.136,63 €        | 11.793,07 €<br>(21.355,1)  | 4539,3€<br>(562-13.691)     |
| 2010           | 24                         | 112.678,27 €        | 4.694,93 €<br>(5.163,2)    | 2.019,5€<br>(749-8.333)     |
| 2011           | 27                         | 157.433,13 €        | 5.830,86 €<br>(7.506,7)    | 2.007,0€<br>(1.132-9.666)   |
| 2012           | 32                         | 255.950,40 €        | 7.998,45 €<br>(14.372,2)   | 2.364,5€<br>(651-11.463)    |
| 2013           | 23                         | 156.068,33 €        | 6.785,58 €<br>(8.452,9)    | 2.095,0€<br>(981-12.198)    |
| 2014           | 20                         | 172.394,60 €        | 8.619,73 €<br>(12.162,1)   | 3.142,5€<br>(336-14.147)    |
| 2015           | 19                         | 308.693,53 €        | 16.247,03 €<br>(24.917,5)  | 5.338,0€<br>(508-21.944)    |
| 2016           | 25                         | 841.849,43 €        | 33.673,98 €<br>(117.072,4) | 3.182,0€<br>(244-9.997)     |
| 2017           | 30                         | 1.448.513,87 €      | 48.283,80 €<br>(45.990,5)  | 17.661,9€<br>(4.223-59.264) |

|      |    |                |                           |                            |
|------|----|----------------|---------------------------|----------------------------|
| 2018 | 34 | 1.151.108,87 € | 33.856,14 €<br>(28.968,3) | 9.672,5€<br>(4.144-18.573) |
| 2019 | 27 | 410.592,50 €   | 15.207,13 €<br>(17.612,5) | 1.062.3€<br>(244-10.578)   |
| 2020 | 28 | 578.502,83 €   | 20.660,82 €<br>(22.205,3) | 5.117,5€<br>(706-30.097)   |
| 2021 | 29 | 638.866,17 €   | 22.029,87 €<br>(26.123,6) | 13.300,0€<br>(728-25.120)  |
